# Supplementary material for: Polar–nonpolar interconnected elastic networks with increased permittivity and high breakdown fields for dielectric elastomer transducers
Source: Royal Society of Chemistry journal article supplement (doi:10.1039/c5ra06865g), 2015-01-01
Supplement: c5ra06865g1.pdf [file c5ra06865g1.pdf]

**Supplementary Information for:**

**Polar-nonpolar interconnected elastic networks with increased permittivity and high breakdown fields for dielectric elastomer transducers**

Carmen Racles\*<sup>1</sup>, Adrian Bele<sup>1</sup>, Mihaela Dascalu<sup>1</sup>, Valentina Musteata<sup>1</sup>, Cristian Dragos Varganici<sup>1</sup>, Daniela Ionita<sup>1</sup>, Stelian Vlad<sup>1</sup>, Maria Cazacu<sup>1</sup>, Simon J. Dünki<sup>2</sup>, Dorina M. Opris\*<sup>2</sup>

*<sup>1</sup>Petru Poni Institute of Macromolecular Chemistry, Aleea Grigore Ghica Voda 41A, Iasi, 700487, Romania.*

*<sup>2</sup>Empa, Swiss Federal Laboratories for Materials Science and Technology, Laboratory for Functional Polymers, Ueberlandstr. 129, CH-8600, Dübendorf, Switzerland.*

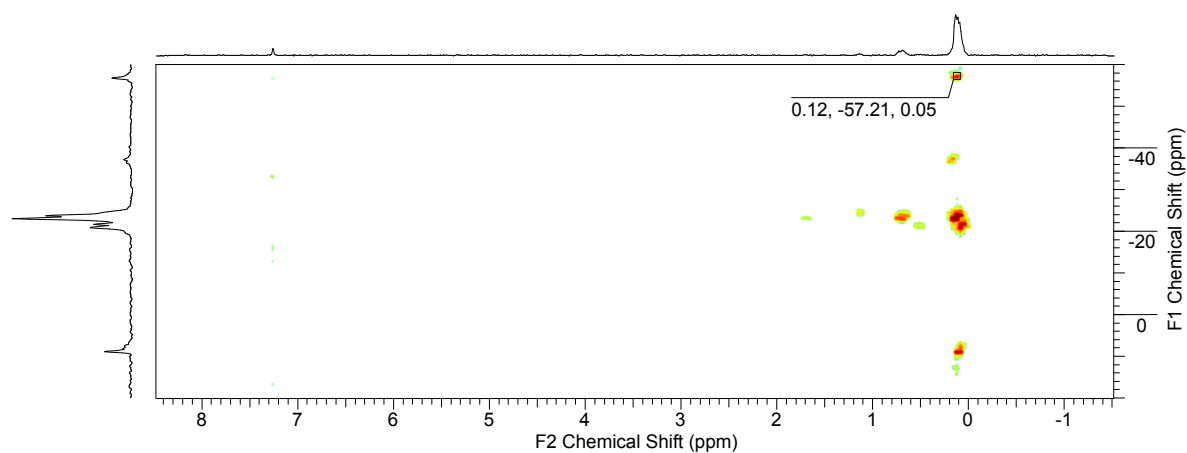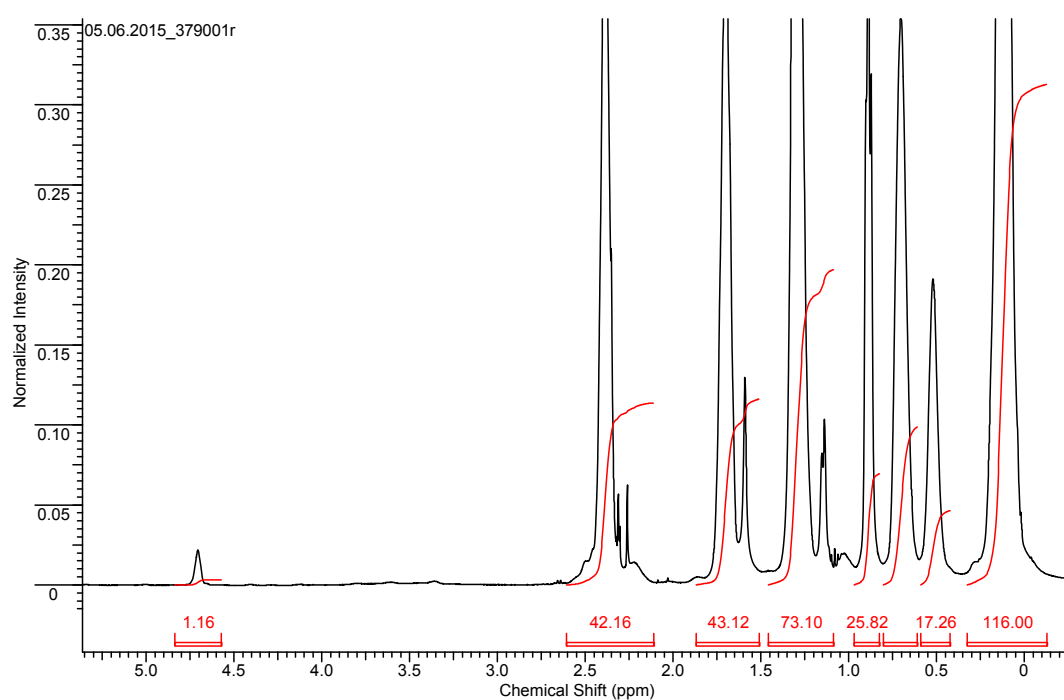

**Figure S1:**  $^{29}\text{Si}$  NMR and  $^1\text{H}$  NMR spectra of a partially cross-linked copolymer ( $\text{P}_{62}$ ). The signal at -57 ppm in the  $^{29}\text{Si}$  spectrum is assigned to trifunctional siloxane, while the Si-H signal is seriously diminished (for comparison see Figure S5b).

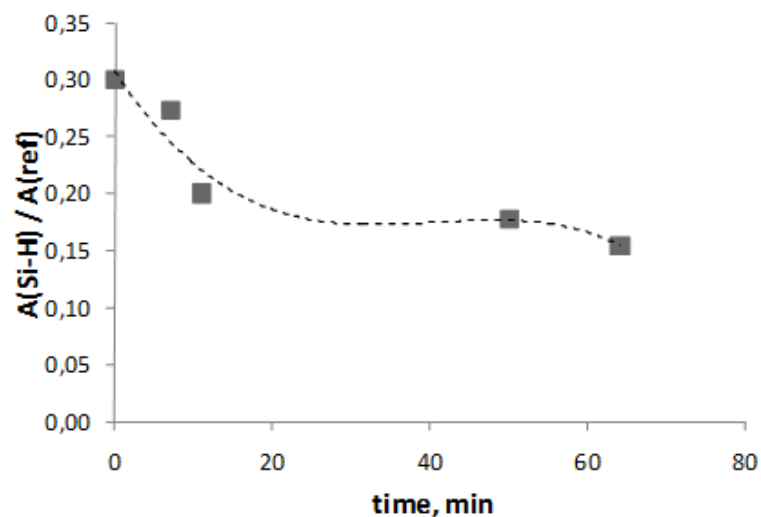

**Figure S2:** Reaction monitoring with IR spectroscopy: variation of the Si-H stretching band at  $2154\text{ cm}^{-1}$  versus Si-CH<sub>3</sub> symmetric band at  $1260\text{ cm}^{-1}$  due to hydrolysis of P<sub>62</sub> as function of time.

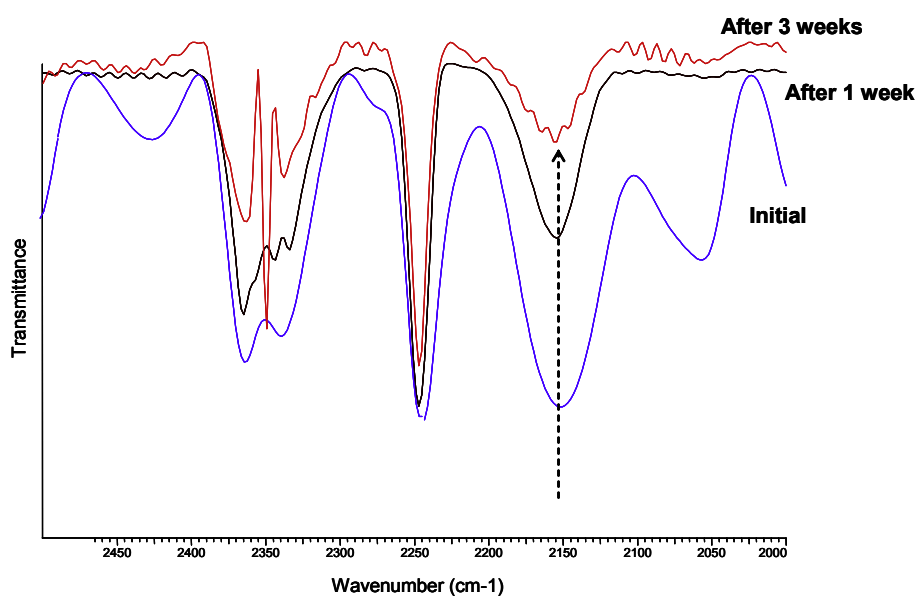

**Figure S3:** Evolution of the Si-H stretching band in a cross-linked film within three weeks.

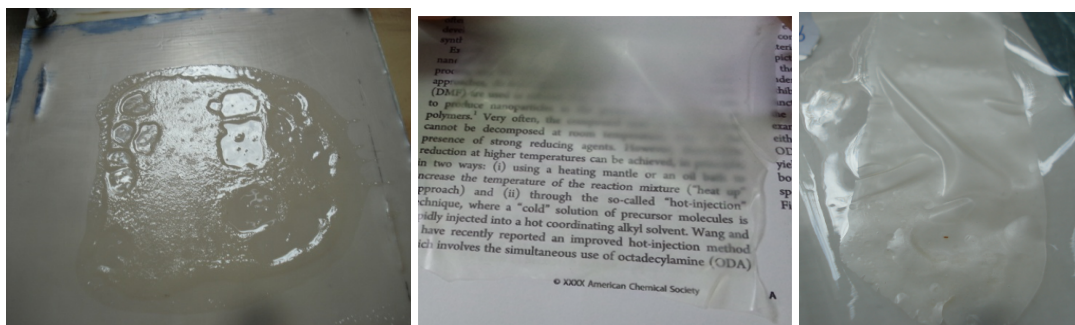

**Figure S4:** Image of a blend of cross-linked PDMS and P<sub>62</sub> (left), P<sub>62</sub>(1/3) (middle) and P<sub>62</sub><sup>part</sup>(1/2) (right). Macroscopic phase separation can be seen when P<sub>62</sub> is not cross-linked (the left-side photo).

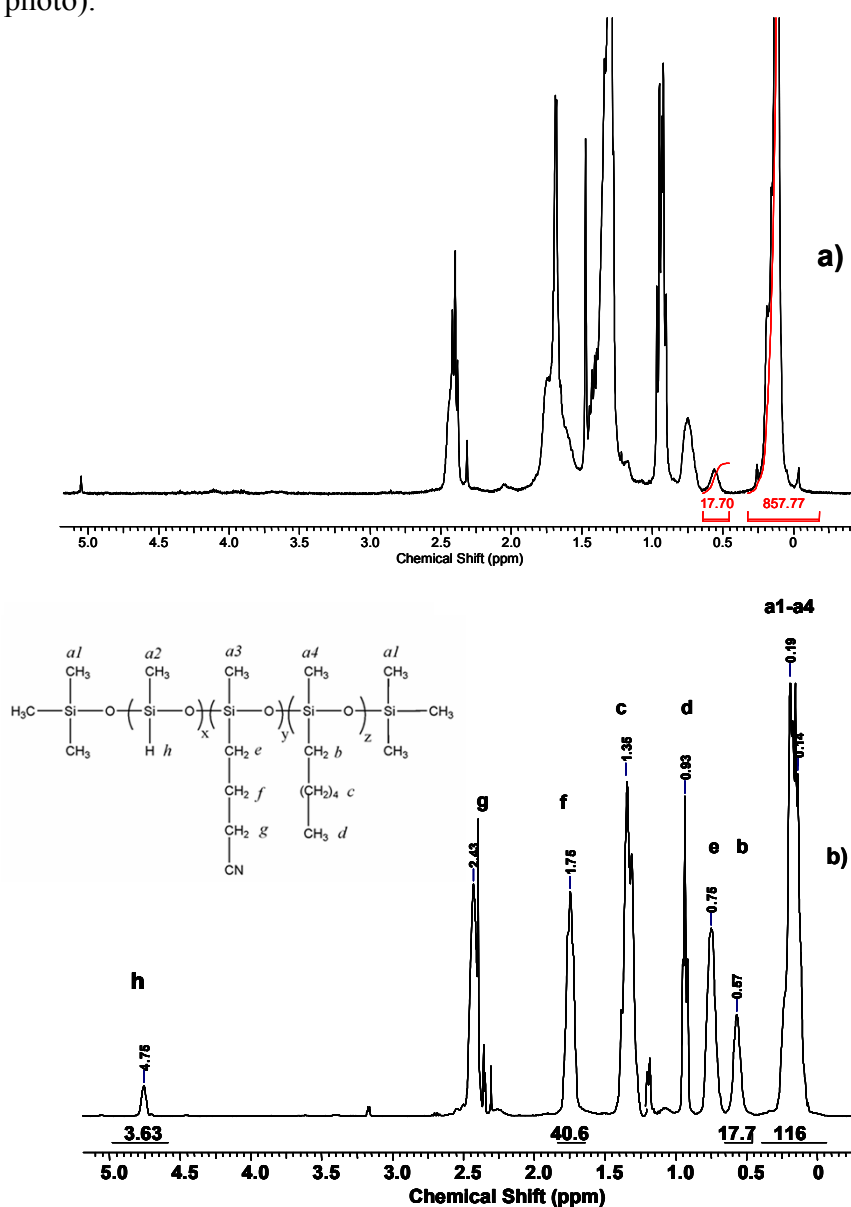

**Figure S5:** <sup>1</sup>H NMR spectrum of the extract from film P<sub>62</sub>(1/2) (a), compared with the starting copolymer (b). The ratio between the Si-CH<sub>2</sub> and Si-CH<sub>3</sub> protons indicate that the extract contains little amount of un-cross-linked P<sub>62</sub> and a high amount of un-cross-linked PDMS (possible macrocycles) –roughly 1:7.4. A large amount of DBDTL catalyst is, as expected, present in the extract. No signal for Si-H protons can be seen.

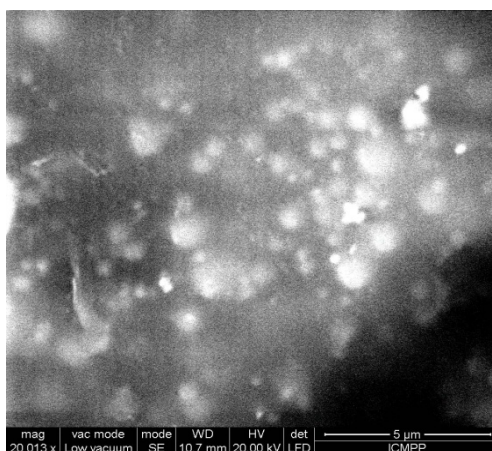

**Figure S6:** SEM image of cross-section of material  $P_{62}^{\text{part}(1/2)}$ .

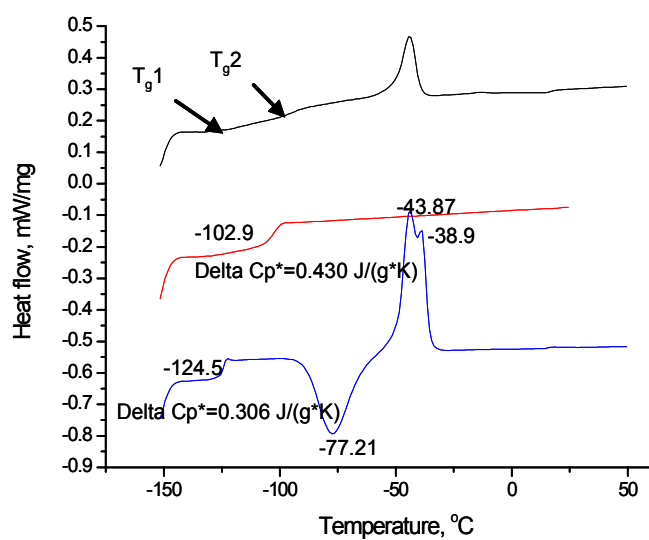

**Figure S7:** DSC scans (second heating) of  $P_{10}$  (red), PDMS (blue) and  $P_{10}^{\text{part}(1/2)}$  (black).

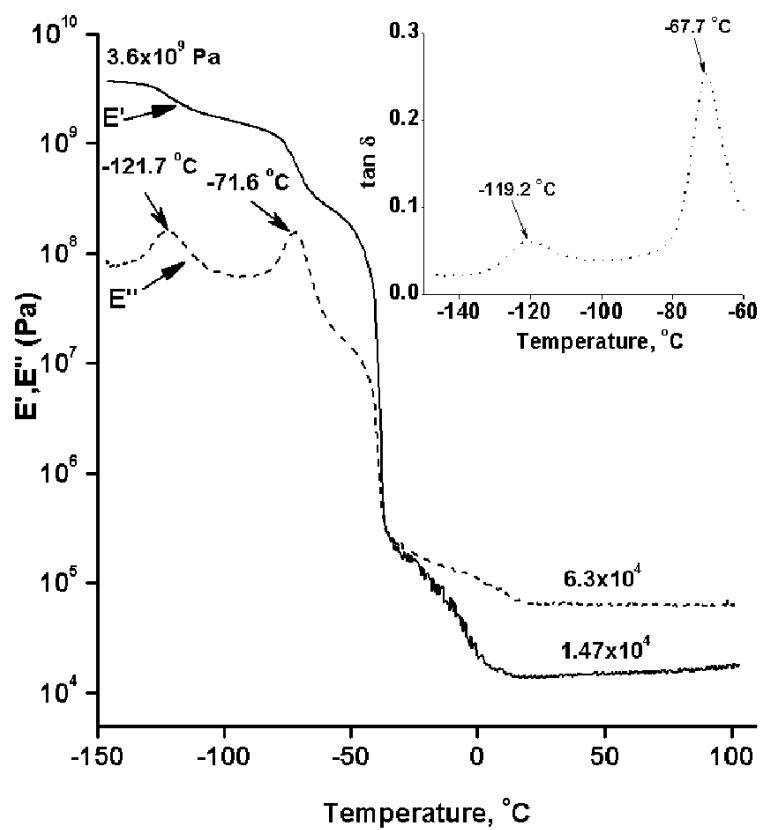

**Figure S8:** DMA curves of  $P_{62}(1/2)$  in tension mode, at 1 Hz, at a heating rate of  $2^\circ\text{C}/\text{min}$ .

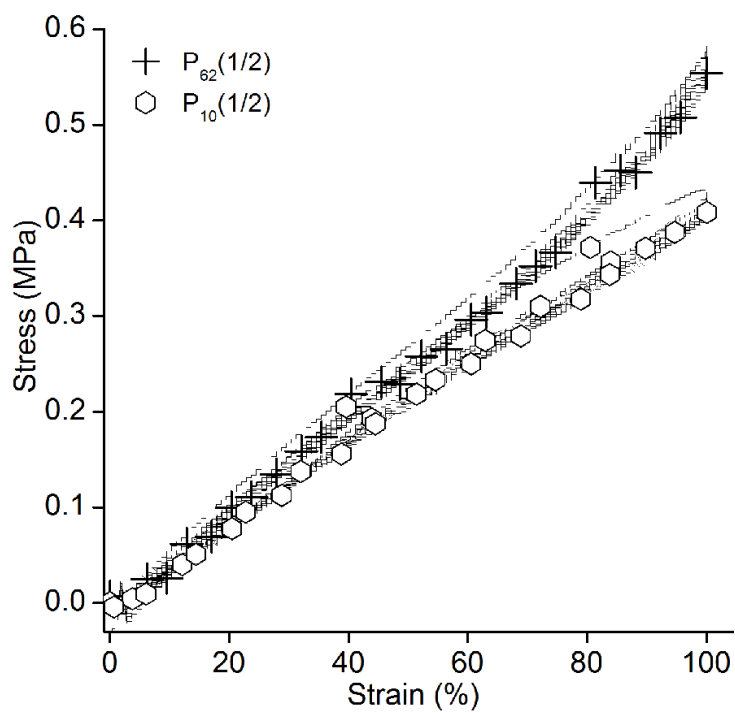

**Figure S9:** The cyclic test results for materials  $P_{62}(1/2)$  and  $P_{10}(1/2)$ .

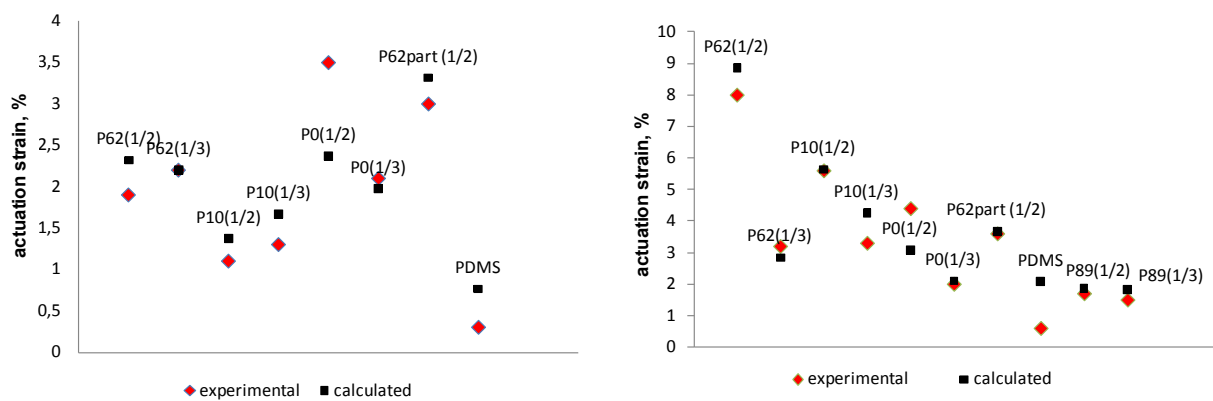

**Figure S10:** Calculated and experimental actuation strain at 30 V/ $\mu\text{m}$  (left) and at breakdown (right)

Table S1: Mechanical properties of the optimized materials compared to the corresponding ones with similar composition.

| Sample                              | Young modulus (MPa) |      |      |      | Tensile strength [MPa] | Elongation at break [%] |
|-------------------------------------|---------------------|------|------|------|------------------------|-------------------------|
|                                     | 10%                 | 20%  | 50%  | 100% |                        |                         |
| <b>P<sub>62</sub>(1/3)</b>          | 0.75                | 0.62 | 0.41 | 0.39 | 1.02                   | 208                     |
| soft <b>P<sub>62</sub>(1/3)</b>     | 0.28                | 0.21 | 0.67 | 0.50 | 1.19                   | 350                     |
| <b>P<sub>62</sub>part(1/2)</b>      | 0.48                | 0.45 | 0.46 | 0.70 | 1.71                   | 247                     |
| soft <b>P<sub>62</sub>part(1/2)</b> | 0.14                | 0.32 | 0.20 | 0.48 | 0.63                   | 489                     |

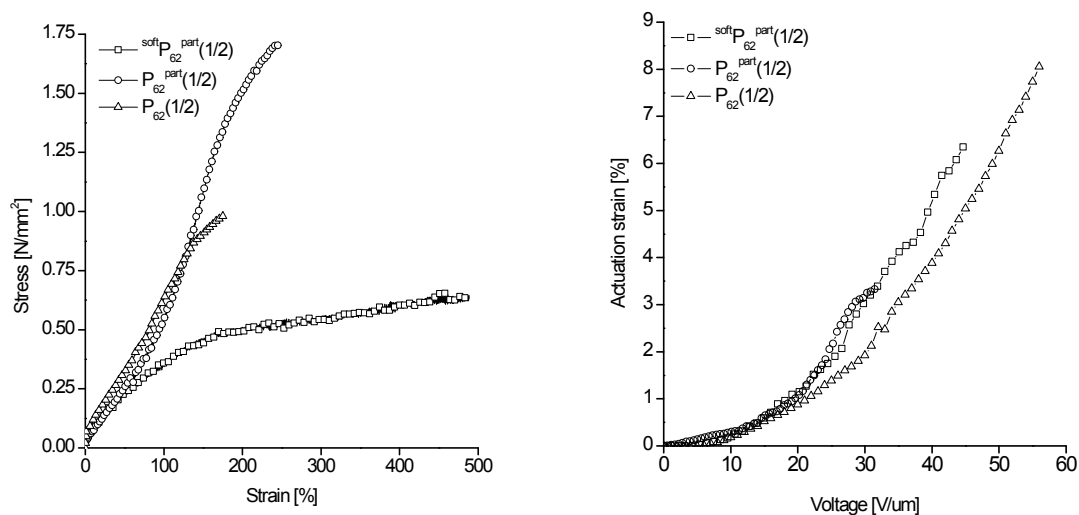

**Figure S11:** Stress-strain curve (left) and electromechanical response (right) of all-polymer composites compared with the interconnected network with similar composition.
